# Supplementary material for: Leptin’s Pro-Angiogenic Signature in Breast Cancer
Source: Cancers (Basel). 2013 Sep 6;5(3):1140–62. doi: 10.3390/cancers5031140 (PMC3795383; doi:10.3390/cancers5031140)
Supplement: Supplementary File 1 — Supplementary (XLSX, 53 KB) [file cancers-05-01140-s001.xlsx]

## Sheet: Relation Table
Relation	Type	Sentence	MedLine Reference	Connectivity	# of References	Owner	BiomarkerType
BCL2; PI3K; NF-kB; KDR; IL6; AKT1; EGFR; NFKBIA; DUSP1; ESR1; NOTCH1; Breast Neoplasms; gamma-secretase; PDPK1; DLL4; ERBB4; HDAC1; ABCG2; PIP3	Expression			19	0
ICAM1 --+> MMP2	Regulation	From correlation analysis ensues that the bond of ICAM-1 and VCAM-1 on chondrocytes with appropriate integrin ligands probably leads to up-regulation of gelatinase A and B and to down-regulation of TIMP-1., Similarly, the functional relationship between LFA-1/ICAM-1 and MMP-9 may also explain the previously reported inability of purified ICAM-1 to induce MMP-2, and of purified VCAM-1 to induce MM…	12404960:8, 9510201:1225	2	2
ICAM1 --+> MMP9	Expression	Specificity of the blocking effect of anti-LFA-1 and anti-ICAM-1 was demonstrated by the inability of anti-ICAM-2, alone or with anti-LFA-1, to inhibit expression of MMP-9., Anti-ICAM-1 monoclonal antibody prevents the ischemia-induced raise of MMP-9 in brain. (A) Zymography showing MMP-9 (95-kDa, 88-kDa, and dimers of high molecular weight)., Because ICAM-1 engagement by ligand or antibody stimu…	9510201:1202, 14663338:1202, 12149643:1087, 9725228:1156, 15217903:1203, 11590195:1031	2	6
ICAM1 --+> vascularization	Regulation	Furthermore, sICAM-1 may enhance tumor growth by promoting angiogenesis and escape from immunosurveillance., However, the regulation mechanisms of polymorphonuclear leukocyte-induced angiogenesis mediated by ICAM-1 remain unclear., Intercellular adhesion molecule-1 (ICAM-1) is thought to be involved in the processes of metastasis and angiogenesis in various tumors., Intercellular adhesion molecul…	10537287:5, 15147829:1, 18339430:2, 14615040:2, 17393097:14, 19306055:0, 9194210:9, 10323764:6, 10823350:7, 20616316:1344 <more data available...>	2	32
ICAM1 ---> arteriogenesis	Regulation	ICAM-1 upregulation may substitute for MCP-1 signaling through CCR2 in order to allow normal arteriogenesis in CCR2 -/- mice., Thus, ICAM-1 is not only important for stimulation of arteriogenesis induced by the infusion of monocyte chemoattractants, but it also appears essential for monocyte adhesion and transmigration during the time course of collateral artery growth., This apparently contradic…	15472609:10, 15059933:1175, 20056909:1222, 16684892:1033	2	4
ICAM1 ---> Breast Neoplasms	Regulation	The interaction between MUC1 and ICAM-1 may be critical to the process of bloodborne metastases in breast cancer., Thus, the study suggests that blocking of OPN-induced ICAM-1 expression through mTOR/p70S6 kinase signaling may be an important therapeutic target for the management of breast cancer.	8797599:4, 20459645:1364	2	2
ICAM1 ---> endothelial cell activation	Regulation	Furthermore, studies utilizing knockout mice and specific monoclonal anti-VCAM-1 antibodies have demonstrated that expression of ICAM-1, P-selectin, E-selectin and VCAM-1 are important in in vivo antiphospholipid-mediated thrombosis and endothelial cell activation in mice., ICAM-1 expression in human umbilical vein endothelial cells also was promoted by a 47-kDa integral membrane lipoprotein puri…	12892395:10, 1347056:4, 19307690:6	2	3
ICAM1 ---> endothelial cell proliferation	Regulation	lactosylceramide stimulates the expression of CD11/CD8, or Mac-1, on the surface of human neutrophils and orchestrates a signal transduction pathway that leads to vascular endothelial cell proliferation by a redox-dependent transcriptional pathway that is mediated by the expression of tumor necrosis factor a -induced nuclear factor ?B and intercellular adhesion molecule (ICAM-1) (Chatterjee, 1998…	12202378:1150	2	1
IL1A --+> Breast Neoplasms	Regulation	IL-1a therefore, may constitute an effective and rational target to treat pre-invasive and invasive human breast malignancies., Interleukin-1 alpha promotes tumor growth and cachexia in MCF-7 xenograft model of breast cancer., IL1A is thought to contribute to breast cancer expression by up-regulating pro-metastatic genes in breast cancer cells and stromal cells [65]., In IL-1a-stimulated human br…	16619041:1189, 14633625:100, 16842617:1155, 17640948:1714	2	4
IL1A --+> ICAM1	Expression	IL-1 alpha-induced ICAM-1 expression may play an important role in the adhesion process., Levels of ICAM-1 mRNA were also up-regulated by tumour-secreted IL-1alpha., Finally, both lipopolysaccharide and IL-1 alpha up-regulated ICAM-1 and VCAM-1 gene expression., IL-1alpha increased ICAM-1,VCAM-1, and E-selectin expression compared to controls., Stimulation of hepatocytes with IFN-gamma and IL-1 a…	14766082:7, 9374368:3, 8004813:7, 12923654:8, 7709438:5, 8649201:3, 8096222:8, 9229375:5, 7521369:7, 10741905:3 <more data available...>	2	56
IL1A --+> ITG	Expression	IL-1alpha upregulated the expression of alpha6 and beta1 integrins without any alterations of alpha5 and alphav integrins expression., Alteration of integrins by interleukin-1alpha in human pancreatic cancer cells., For instance, interleukin-1a could increase the expression of MMP-9, E-selectin, integrin-1, and IL-8 and inhibit plasminogen activator inhibitor-1 (34, 50-53)., We found that macroph…	16504015:3, 11668210:100, 14679213:1322, 9874575:1194	2	4
IL1A --+> ITGB1	Expression	IL-1alpha upregulated the expression of alpha6 and beta1 integrins without any alterations of alpha5 and alphav integrins expression., IL-1 alpha and TNF-alpha induced heterogeneous modulation of beta 1 integrin expression in the four melanoma cell lines tested; downward shift of the alpha 2, alpha 3, alpha 4, and beta 1 integrin subunits was detected among three of the melanoma cell lines as wer…	16504015:3, 8006453:6, 16407822:1203	2	3
IL1A --+> LEP	Expression	In comparison with controls, leptin production was stimulated to 320 +/- 16% (P < 0.0001) and 195 +/- 3.2% (P < 0.0004) by 3 and 10 ng/ml of interleukin-1alpha respectively. 17beta-oestradiol 10(-6) to 10(-9) mol/l increased basal leptin production 5-9-fold, while 10(-5) mol/l had no such effect., IL-1alpha and TNF-alpha treatment significantly stimulated leptin secretion and leptin mRNA expressi…	10541571:5, 15118268:7, 14633625:9, 11231368:1254, 10068609:1074, 9284748:100, 16131609:1066, 14993491:1189, 10830276:1040	2	9
IL1A --+> MMP2	Expression	In addition 12-O-tetradecanoylphorbol-13-acetate and interleukin-1 alpha also increased 72-kDa gelatinase activity., Interleukin-1 alpha produces a dose-dependent several-fold elevation of gelatinase B, stromelysin, and TIMP1 without changing gelatinase A levels., Although Il-1 alpha had no significant effect on TIMP-2 mRNA or on expression of 72-kDa gelatinase, in either early or late passage ce…	1435512:5, 8225873:6, 8020585:4, 12687549:1298, 11820363:100, 17907161:1127, 9492070:1175, 14581361:1049, 10377072:1173	2	9
IL1A --+> MMP9	Expression	MMP3 and MMP9 mRNAs were also inducible in these cells by IL-1alpha stimulation., The IL-1alpha-stimulated MMP9 messenger RNA production was suppressed by cortisol but not P., Pathophysiologic concentrations of interleukin -1alpha rapidly induced pro-MMP-9 synthesis by human skin., Recombinant IL-1alpha upregulated the expression of both MMP-9 and -13, and the induction of MMP-13 but not MMP-9 co…	11330935:5, 18722610:6, 16291395:5, 14631115:5, 11376631:6, 18274772:6, 10509643:11, 15102045:9, 9046999:5, 8314909:0 <more data available...>	2	17
IL1A --+> vascularization	Regulation	Interleukin -1alpha plays an important role in colon cancer progression and angiogenesis., Daily administration of 3 pmol of IL-1 alpha or IL-8 caused intense neovascularization., VEGFR-1 blocking antibodies had a marginal inhibitory effect on IL-1alpha-induced angiogenesis., Moreover, we show that IL-1alpha enhanced colorectal neoplasia, stimulating cell migration and neoangiogenesis., In contra…	19204921:0, 7538184:5, 12205052:9, 17371964:5, 18395750:7, 20872950:0, 7515856:5, 15084984:6, 9245645:1, 21270123:0 <more data available...>	2	31
IL1A --+> VEGFA	Expression	Addition of exogenous Interleukin1 alpha, but not IL6, significantly increased VEGF production., Interleukin-1alpha induced vascular endothelial growth factor production in a dose-dependent and time-dependent manner., Moreover, IL-1 alpha and IL-1 beta enhanced VEGF and iNOS expression by murine peritoneal macrophages., The induction of VEGF expression by prostaglandin E2 and interleukin-1 alpha …	15745939:12, 19210337:8, 19458323:8, 7556649:4, 18395750:5, 9701011:3, 10896254:6, 10629075:8, 10369746:5, 15004178:1294 <more data available...>	2	27
IL1A --+> VEGFC	Expression	Tumor necrosis factor-alpha and IL-1alpha also elevated VEGF-C mRNA steady-state levels, whereas the Interleukin-1 receptor antagonist and dexamethasone inhibited the effect of IL-1beta., It is known that the level of VEGF-C mRNA is upregulated by various factors including IL-1a (Ristimaki et al. 1998).	9525952:6, 16954441:1244	2	2
IL1A ---> endothelial cell activation	Regulation	Activation of ECs by complement depended on the autocrine action of IL-1alpha, because complement-mediated endothelial cell activation was inhibited by anti-IL-1alpha antibodies., Accordingly, endothelial cell activation by the membrane attack complex depends on both transcriptional regulation of IL-1alpha and availability of that cytokine to broadly modify endothelial cell physiology., Different…	10769290:5, 18292602:4, 16514066:100, 11549652:1066	2	4
IL1A ---> endothelial cell proliferation	Regulation	In contrast, blockade of IL-1alpha inhibited both human umbilical vein endothelial cell proliferation and angiogenesis., In contrast, blockade of IL-1alpha or IL-8 inhibited human umbilical vein endothelial cell proliferation and angiogenesis., IL-1a is known to inhibit endothelial cell proliferation, and thereby to promote the type of endothelial injury that is thought to precipitate atherogenes…	18395750:7, 15084984:6, 12615956:1306, 12881412:1042	2	4
IL1B --+> Breast Neoplasms	Regulation	Interleukin-1beta and fibroblast growth factor receptor 1 cooperate to induce cyclooxygenase-2 during early mammary tumourigenesis.	19393083:100	2	1
IL1B --+> endothelial cell activation	Regulation	Anti-CD14 antibodies did not affect endothelial cell activation induced by IL-1 beta, tumour necrosis factor-alpha (TNF-alpha) and phorbol 12-myristate 13-acetate (PMA)., This inhibitory effect of N,N,N-trimethylsphingosine on IL-1 beta-dependent endothelial cell activation may partly explain the known anti-inflammatory or anti-metastatic effect of N,N,N-trimethylsphingosine in vivo., We conclude…	7503948:6, 7540991:4, 7583352:7, 9607219:1148, 14581484:1366, 10528660:1251, 19213954:1231	2	7
IL1B --+> endothelial cell proliferation	Regulation	In addition, PEDF inhibits the VEGF-and IL-1beta-induced endothelial cell proliferation, migration and tube formation.	20006737:7	2	1
IL1B --+> ICAM1	Expression	TNF-alpha and IL-1 beta also increased the expression of ICAM-1 on MMG2., IFN-gamma, IL-1 beta and TNF-alpha produced a clear enhancement of ICAM-1 expression., Interleukin -1beta mainly up-regulated ICAM-1 expression., Sulprostone, an EP1/EP3 agonist, had no effect on IL-1beta-elicited ICAM-1 expression., The treatment with IFNgamma or IL-1beta enhanced the expression of CD54., IL-1beta increase…	8097520:4, 1373059:3, 16734619:3, 11201045:9, 15499832:3, 16822504:5, 15733557:3, 15389584:5, 17275031:8, 17029006:4 <more data available...>	2	104
IL1B --+> ITG	Expression	These findings suggest that human IL-1 beta differentially regulates expression of integrins., Under substrate adherent conditions, integrin gene expression can be regulated by transforming growth factor-beta, interleukin-1 beta, and prostaglandins., Thus, IL-1 beta and TGF-beta 1, which usually have antagonistic functions in connective tissue, can regulate integrin expression in a synergistic wa…	1748714:3, 1429694:0, 1744142:10, 2786815:1, 17702847:1255, 10458713:1158, 7543825:1172	2	7
IL1B --+> ITGB1	Expression	GFs or BMS-345541 (specific inhibitor of the IKK) reversed the IL-1ß-induced down-regulation of collagen type II, cartilage specific proteoglycans, ß1-integrin, Shc, activated MAPKinase, Sox-9 and up-regulation of active caspase-3., Production of IL1-beta by ovarian cancer cells induces mesothelial cell beta1-integrin expression facilitating peritoneal dissemination., Monomeric collagen and PDGF-…	22194879:6, 22296757:100, 22770800:7	2	3
IL1B --+> MMP2	Expression	MMP-2 mRNA expression was significantly upregulated by IL-1beta (4 ng/ml and 10 ng/ml, all P<0.01)., SN50, NF-kappaB inhibitor peptide, inhibited IL-1beta-stimulated increases in MMP-2 and -9 expression and activity., TNF-alpha, IL-1beta, and IL-6 increased the mRNA and/or protein expression of MMP-1, MMP-2, and MMP-3., Overexpression of IL-1beta resulted in augmentation of expression of the cyto…	19671357:6, 15269222:11, 16934628:5, 12824917:3, 19602123:9, 12592549:10, 16987994:7, 14638701:9, 15272234:6, 8756539:5 <more data available...>	2	39
IL1B --+> MMP9	Expression	IL-1ß has been reported to induce matrix metalloproteinase-9 (MMP-9) expression., Moreover, TNF-alpha as well as IL-1 beta induced the expression of MMP9., MMP-9 messenger RNA was dramatically decreased by IL-1beta only in low oxygen tension., Both IL-1beta and TNF-alpha augmented MMP-9 expression in HT1080 cells., IL-1beta enhanced nuclear factor kappaB activation, MMP-9 expression, and the inva…	21199898:5, 9631748:7, 15529381:11, 11747375:7, 15014040:5, 18276934:9, 11067938:7, 11825017:11, 15269222:11, 19097983:3 <more data available...>	2	109
IL1B --+> NOTCH2	Regulation	Induction of nestin, LIF and Notch-2 by interleukin-1ß/transforming growth factor-ß can be reverted after cytokine withdrawal.	22330721:6	2	1
IL1B --+> vascularization	Regulation	We examined the association between IL-1beta-induced angiogenesis and cell inflammation., However, dexamethasone's impact on interleukin -1beta-dependent inflammatory angiogenesis is unknown., This is the first report that COX2 and some prostanoids play a key role in IL-1beta-induced angiogenesis., IL-1 beta-induced angiogenesis was markedly reduced in monocyte chemoattractant protein-1 knockout …	16239969:2, 17690185:1, 14769824:7, 16227824:9, 16936436:1, 15202019:7, 12057931:10, 21435467:9, 16129959:4, 15126358:13 <more data available...>	2	73
IL1B --+> VEGFA	Expression	IL-1beta increased the activity of the VEGF promoter-reporter construct., IL-1beta regulated VEGF-A and angiopoietin-1 expressions in a dose-dependent manner., In contrast, TBF-beta and IL-1beta caused an increase in VEGF production., Furthermore, IL-1beta synergistically enhanced the effect of OSM on VEGF production., Treating TMK-1 cells with IL-1beta also increased VEGF promoter activity., tri…	10408390:9, 16565972:12, 11423727:9, 17525365:9, 15349119:8, 16049703:12, 18758357:10, 12789234:8, 15126358:8, 11040101:5 <more data available...>	2	107
IL1B --+> VEGFC	Expression	IL-1beta and tumor necrosis factor-alpha also stimulated the production of VEGF-C protein by the fibroblasts., We found that proinflammatory cytokine, interleukin-1beta (IL-1beta), could induce lymphangiogenesis in mouse cornea through enhanced production of potent lymphangiogenic factors, VEGF-A, VEGF-C and VEGF-D., Our results suggest that Lysophosphatidic acid-stimulated lymphangiogenesis in h…	9525952:9, 18951870:1, 21151531:6, 18667841:4, 12471041:1198, 14603252:1077, 19237567:1054, 12915657:1183, 17015745:1177, 16570043:1238	2	10
IL1B ---> blood vessel development	Regulation	IL-1ß disrupted pulmonary vascular development and decreased the production of VEGF.	16888287:1238	2	1
IL1B ---> Breast Neoplasms	Regulation	Interleukin-1ß (IL-1ß), which is involved in inflammatory and immunological responses, plays an important role in the development and progression of breast cancer., The inflammatory chemokines CCL2 (MCP-1) & CCL5 (RANTES) and the inflammatory cytokines TNFa & IL-1ß were shown to contribute to breast cancer development and metastasis., These studies demonstrate that tumor-associated IL-1alpha+, IL…	20437198:0, 21486440:0, 9864403:4, 12127053:1, 19393083:100, 18708360:1055, 16148018:1190	2	7
IL1B ---> endothelial cell proliferation	Regulation	In addition, PEDF inhibits the VEGF-and IL-1beta-induced endothelial cell proliferation, migration and tube formation., Sera were then assayed for immunologically detectable IL-1ß by ELISA. (C) Systemic neutralization of IL-1ß significantly inhibits Myc-induced islet endothelial cell proliferation., When compared to the positive control value derived from the cells stimulated with FGF-2, both int…	20006737:7, 16980582:1200, 19136710:1266, 12881412:1042	2	4
IL1B ---> endothelialization	Regulation	Furthermore, it is unlikely that reendothelialization after vascular injury is influenced by the ASC-regulated inflammatory cytokines interleukin-1ß and IL-18.	18541743:1241	2	1
IL1B ---> ITGB1	Expression	The suppression of collagen type II and beta1-integrin synthesis by IL-1beta was inhibited by curcumin., Incubation of chondrocytes with IL-1ß resulted in induction of apoptosis, downregulation of ß1-integrins and the extracellular signal-regulated kinase 1/2 ., Resveratrol significantly reduced the IL-1beta-induced inhibition of expression of cartilage-specific collagen type II and signal transd…	16320828:8, 21484156:5, 17404069:5, 9849316:9, 2521862:6	2	5
IL1B ---> NOTCH1	Regulation	Additionally, the Notch1 upregulation mediated by IL-1ß could facilitate NF-?B activation, thus downregulating I?Ba expression., The ?-secretase-mediated S3 cleavage of Notch is enhanced by TNF-a, IL-1ß, and IFN-?.	17881497:1221, 15347683:1147	2	2
IL1B ---| NOTCH3	Expression	Indeed, this cytokine modulates Notch signaling components and expression of inflammatory enzymes simultaneously (Couturier et al., 1999[Go]; Jiang et al., 2004[Go]), and a mutated form of I?Ba blocking dissociation of the NF-?B complex prevents the IL-1ß-induced inhibition of Notch3 and Hairy and enhancer of split1 gene expression (Fig. 5B).	17881497:1205	2	1
ITG --+> Breast Neoplasms	Regulation	Targeting a(V)-integrins decreased metastasis and increased survival in a nude rat breast cancer brain metastasis model.	22842979:100	2	1
ITG --+> IL1A	Expression	We conclude that suprabasal integrin expression leads to Erk activation and increased IL-1alpha expression by potentiating activation of the EGF receptor., We have previously shown that suprabasal integrin expression results in activation of Erk MAPK and increased IL-1a production (Haase et al, 2001; Hobbs and Watt, 2003)., Regulation of interleukin-1a expression by integrins and epidermal growth…	12654926:7, 15304090:1145, 18766172:1422, 16354192:1373	2	4
ITG --+> IL1B	Expression	The results indicate that monocyte adhesion was affected by the substrate and the RGD sequence and beta1 or beta3 containing integrin receptors. beta1- or beta3-containing integrin receptors were also involved in IL-1beta gene and protein expression in monocytes adhered to gelatin-based biomaterial surfaces., Regulation of IL-1ß mRNA by integrins in bovine chondrocytes., Inhibition of adhesion- a…	17623553:11, 10679109:1210, 7541794:1226, 20543863:100, 9062344:1075, 11489912:1122, 12121221:1031	2	7
ITG --+> MMP2	Expression	We also examined which integrins mediated the expression and secretion of matrixins MMP-2 and MMP-9., Inhibition of the signal activity of the integrins by RGD-containing pentapeptide or by genistein reduces markedly in vitro invasion in Matrigel and MMP-2 production., Expression of MMP-2, MT1-matrix metalloproteinase and TIMP-2 was affected by IR and anti-integrin treatment., These data indicate…	12177247:7, 15236606:5, 14647148:1227, 16474180:1292, 10429943:100, 17018612:1072	2	6
ITG --+> MMP9	Expression	We also examined which integrins mediated the expression and secretion of matrixins MMP-2 and MMP-9., In addition, engagement of integrin receptors by the disintegrin-cysteine-rich domain resulted in ERK phosphorylation and increased MMP-9 synthesis., Expression of MMP-9 was elevated by integrin aggregation, integrin-mediated ectodomain shedding was inhibited by a MMP-9 function blocking antibody…	12177247:7, 17704059:6, 17332331:5, 17174275:5, 15728252:1251, 12874388:1215, 16636068:1353, 19272161:1188, 11073115:1238, 20103658:1302 <more data available...>	2	15
ITG --+> vascularization	Regulation	Alpha v integrins are thought to play an important role in tumor angiogenesis., Integrins alphavbeta3 and alphavbeta5 are involved in angiogenesis., It is not known which integrins are involved in the initial stages of angiogenesis in vivo., Furthermore, our data provide a novel method by which an integrin may regulate angiogenesis., It is becoming clear that integrins regulate angiogenesis in bo…	16835373:0, 17497369:1, 8077704:1, 20639457:5, 16307488:2, 18221059:2, 14760364:2, 15911748:0, 9787163:0, 15777239:6 <more data available...>	2	112
ITG --+> VEGFA	Expression	These findings reveal that integrin-mediated activation of PI-3K-Akt is amplified by integrin-stimulated VEGF expression and they provide a mechanism that substantiates the reported role of alpha 6 beta 4 in carcinoma progression., This finding prompted us to evaluate the mechanism by which this integrin contributes to VEGF transcription., In addition, integrin-matrix interactions modulate expres…	12105188:5, 15256436:1146, 15590642:1286, 15580293:1048, 17483349:1406, 16565398:100, 16921028:1068, 17426256:1250, 23150625:6	2	9
ITG ---- VEGFC	Binding	Importantly, this complex seems to be operative in vivo because an antibody anti-a9ß1 integrin partially reduces the angiogenic effect of VEGF-A.42 The same integrin has been reported to interact with VEGF-C, VEGF-D, and HGF, a finding that may help explain the abnormal lymphatic phenotype of mice expressing a null mutation of the a9 subunit.43,44 Similar observations have been reported for a3ß1 …	18285512:1100	2	1
ITG ---- VEGFR ligand	Binding	Integrins bind angiogenic modulators. 3.1 Integrins bind vascular endothelial growth factors.	18285512:1095	2	1
ITG ---> blood vessel development	Regulation	These integrins on other cells, and/or other integrins on endothelial cells, might contribute to fibronectin assembly and vascular development., Vascular development and maturation are dependent on the interactions of endothelial cell integrins with surrounding extracellular matrix., Various integrins are expressed on trophoblast membrane and participate in placenta anchoring, cell adhesion , mig…	20570943:9, 12067900:0, 20018348:0, 16003770:9, 15576410:6, 12454288:6, 12370271:1060, 12370267:1054, 18351655:1525	2	9
ITG ---> Breast Neoplasms	Regulation	The alphaV integrins play major roles in favouring breast cancer spreading., The integrin family of cell adhesion receptors is essential to breast cancer progression., This PRLr-SIRPa-integrin complex may therefore provide a basis for integrin-PRLr cross-talk and contribute to the biology of breast cancer., In this review, we highlight recent advances in our understanding of how integrins regulat…	10708943:1, 18363848:2, 20826546:9, 20112053:4, 19147560:0, 12908817:11, 8576205:7, 16904607:100, 11172040:100, 14759991:1051 <more data available...>	2	24
ITG ---> endothelial cell proliferation	Regulation	In retinal angiogenesis, hypoxia is the initial stimulus that causes up regulation of growth factors, integrins and proteinases, which result in endothelial cell proliferation and migration that are critical steps in this process., The extracellular binding of NK4 to perlecan inhibits cell-associated assembly of fibronectin, and the impaired fibronectin assembly suppresses integrin-dependent angi…	14575722:2, 20015005:4, 18312855:0, 12063036:10, 17616733:1229, 16186806:1165, 14555703:1263, 21474814:0	2	8
ITG ---> endothelialization	Regulation	RGD peptides completely prevented VEGF-induced cell migration (data not shown), indicating that VEGF-stimulated reendothelialization also depends on integrins., Thus, inhibition of avß3- and avß5-integrins with cyclic RGD peptides blocked reendothelialization of denuded arteries in vivo, suggesting that avß3- and avß5-integrins are involved in the reendothelialization of injured carotid arteries.…	11788463:1091, 15321944:1154	2	2
ITG ---> vasculogenesis	Regulation	Moreover, the beta5 hybridization signal was detected in developing cartilages but not in ossified or ossifying bones. beta5-Integrin is a key integrin involved in angiogenesis, vasculogenesis, hematopoiesis, and bone formation., beta8 integrins are required for vascular morphogenesis in mouse embryos., In vivo, integrins have been shown to be involved in both angiogenesis and vasculogenesis., Th…	11936189:9, 12050137:100, 9022067:1067, 16754788:1134, 16251442:1071, 17363377:1241, 18184864:1271, 16306453:1163, 15618543:1046	2	9
ITGB1 --+> blood vessel development	Regulation	We show that endothelial ß1 integrin plays a crucial role in vascular development and patterning., Although it is notable that ß1-null mice fail to develop a vasculature (51), it is unclear which ß1 integrin plays the most critical roles in vascular development., We provide direct evidence of a link between Notch and ß1 integrins involving R-Ras activation that may represent a central mechanism f…	17984225:1061, 12364323:1304, 17664272:1284, 11909975:1428	2	4
ITGB1 --+> Breast Neoplasms	Regulation	These findings show that beta1 integrin expression has potential prognostic value in invasive breast cancer and that coexpression of fibronectin may help identify patients with more aggressive tumors who may benefit from targeted therapy., Beta1 integrin inhibition dramatically enhances radiotherapy efficacy in human breast cancer xenografts., Indeed, expression of ß1 integrin was shown recently …	17234776:6, 18519702:100, 16452209:1272, 19435818:1347, 16357126:1141, 19147559:1299, 18056629:1035, 18268536:1171, 19147981:1066	2	9
ITGB1 --+> MMP9	Expression	In addition, the hypoxia induced increase of F-actin distribution and cell migration (activation of matrix metalloproteinase-2 and -9) was inhibited by integrin ß1 antibody., Bombesin-dependent pro-MMP-9 activation in prostatic cancer cells requires beta1 integrin engagement., Stack showed that in oral squamous cell carcinoma, multivalent aggregation of a3ß1 integrins up-regulates both uPA and MM…	20677223:6, 12372334:100, 12907660:1137, 17991734:100, 18940913:1146, 11073115:1217, 11557738:1198, 16798740:1280	2	8
ITGB1 --+> vascularization	Regulation	These effects were correlated with the reduced expression of integrin ß1 (ITGB1), an important signaling component of angiogenesis., The alpha(v)beta(3)- and alpha(5)beta(1)-integrins play a key role in angiogenesis, the formation of new vessels in tissues that lack them., Inhibition of beta1-integrin expression blocked local angiogenesis and reduced recovery from neurological deficit., Among the…	21501586:4, 19489579:0, 17651977:8, 11891179:6, 18058911:8, 9914168:5, 11741838:11, 19837065:4, 17161391:8, 19228122:4 <more data available...>	2	37
ITGB1 ---- MMP9	Binding	Our data also suggest that MMP-9 and ß1-integrin interact through the carboxyl-terminal hemopexin domain of MMP-9., In our study, only MMP-9 could be coprecipitated with integrin ß1, and CD44 and DMP-1 could not, corresponding with the results of glycolipid-enriched microdomain/rafts fractionation experiments., Since MMP-9 may bind to ß1 integrin [39], a competition between MMP-9 and collagen for…	18048360:1373, 16636068:1366, 15820209:1239	2	3
ITGB1 ---> endothelial cell proliferation	Regulation	Krit1 modulates beta 1-integrin-mediated endothelial cell proliferation., Induction of endothelial cell proliferation by recombinant and microparticle-tissue factor involves beta1-integrin and extracellular signal regulated kinase activation., Moreover, further issues emerge from molecular studies showing that KRIT1 can regulate either VE-cadherin-mediated endothelial cell-cell junction integrity…	18812969:100, 20616308:100, 20668652:1115	2	3
ITGB1 ---> IL1B	Expression	The ligation of beta 1 integrins with antibodies or F2 fragments also induces the expression of immediate-early genes such as IL-1 beta., The beta(1)-integrin-mediated expression of IL-1beta and IL-6 could contribute to local and systemic inflammatory reactions in atherosclerosis., In MDA-MB231 cells, up-regulation of L1CAM augmented expression of IL-1ß and nuclear factor kappa B activation, whic…	8089188:7, 10669630:9, 22764136:3	2	3
ITGB1 ---> vasculogenesis	Regulation	Antibodies to ß1-integrins cause alterations of aortic vasculogenesis in vivo., Antibodies to beta 1-integrins cause alterations of aortic vasculogenesis, in vivo.	16894628:1445, 1540708:100, 11146503:1694	2	3
ITGB1 ---| VEGFC	Expression	They showed that the loss of NCAM results in the loss of ß1 integrin function, which contributes to loss of tissue integrity, upregulated expression of lymphangiogenic vascular endothelial growth factor-C (VEGFC) and VEGFD, and subsequently increases lymphangiogenesis and the lymphogenic dissemination of tumour cells (Crnic et al, 2004).	15864290:1053	2	1
LEP --+> Breast Neoplasms	Regulation	These results suggest that leptin may have an independent role in breast tumorigenesis., Leptin is a product of the obese gene and plays an important role in breast cancer development., There is evidence that adipokines such as leptin and adiponectin may influence breast tumor development., A recent hypothesis suggests that the adipokines, adiponectin and leptin, are involved in breast cancer dev…	19223908:7, 21472316:2, 19723917:0, 19661131:1, 16525650:5, 14734797:12, 15240518:8, 18715880:2, 17409452:0, 16533767:0 <more data available...>	2	38
LEP --+> endothelial cell activation	Regulation	Leptin induces endothelial cell activation, migration, and proliferation [6] and thus applies a proliferative activity on monocytes [7]., Direct leptin-stimulated endothelial cell activation and angiogenesis were previously reported in nonglomerular endothelial cells, but induction of endothelial cell TGF-ß1 synthesis is a novel and important finding., Since the leptin receptor is known to be exp…	20458445:1045, 10469386:1040, 15111498:1225	2	3
LEP --+> endothelial cell proliferation	Regulation	There is also evidence that leptin stimulates endothelial cell proliferation and the formation of capillary-like tubes in vitro., Pharmacological inhibitors of COX-2, the phosphatidylinositol 3-kinase /Akt pathway and p38(MAPK) abrogated leptin-induced endothelial cell proliferation (assessed by quantifying 5-bromo-2'-deoxyuridine incorporation, calcein fluorescence and propidium iodide staining)…	18448353:1, 21533119:5, 11344271:1095, 18779779:1171, 12149466:1161, 10469386:1019, 21877194:3	2	7
LEP --+> IL1B	Expression	Leptin increased the expression of IL-1beta mRNA evaluated by RT-PCR., Intravenous injection of leptin induced IL-1beta expression in the hypothalamus., At a functional level, leptin up-regulates the IL-1beta, IL-6, IL-12, TNF-alpha, and MIP-1alpha production., IL-1beta transcripts in the hypothalamus were significantly increased on RT-PCR assessment 1 h after the administration of leptin (1 mg/k…	10873603:3, 12676369:3, 15905523:7, 11792675:4, 17350295:7, 17419800:6, 15304373:5, 18547319:8, 20560877:5, 17551224:5 <more data available...>	2	29
LEP --+> ITG	Expression	Leptin-mediated migration and increased integrin expression were attenuated by OBRl receptor antisense oligonucleotide (ODN)., Leptin-mediated migration and integrin upregulation were attenuated by OBRl receptor antisense oligonucleotide., Future studies will have to examine in more detail how interaction of leptin with its receptor on endothelial (progenitor) cells upregulates specific integrins.	20945385:4, 19168585:4, 18658052:1201	2	3
LEP --+> MMP2	Expression	Accordingly, upon quantitative PCR analysis we found that leptin increased expression of matrix metalloproteinase-2 (MMP-2)., Leptin significantly increased both gene and protein levels of MMP-2, MMP-9, cathepsin D, and collagen II, while decreased bFGF markedly in cartilage., Leptin (10-40 ng/ml) induced proliferation of the human umbilical vein endothelial cells and elevation of MMP-2, MMP-9, T…	16376323:4, 19876764:7, 11460888:7, 16238189:9, 15983226:4, 21220407:3, 11799135:1265, 20133323:1307, 20683677:100, 15306556:1073 <more data available...>	2	13
LEP --+> MMP9	Expression	Also, leptin had a detrimental effect on chondrocyte proliferation and induced IL-1beta production and MMP-9 and MMP-13 protein expression., Leptin also induced increases of MMP-2, MMP-9, TIMP-1, and Up-regulated the human coronary artery smooth muscle cells ., Leptin significantly increased both gene and protein levels of MMP-2, MMP-9, cathepsin D, and collagen II, while decreased bFGF markedly …	17350295:7, 11460888:8, 19876764:7, 21220407:3, 11799135:1220, 19620723:1171, 15306556:1073, 11006325:1261, 20723213:1200, 21744298:4 <more data available...>	2	12
LEP --+> NOTCH1	Expression	In addition, blockade of IL-1R tI inhibited leptin-induced Notch, Hey2 and survivin as well as VEGF/VEGFR-2 expression., Leptin treatment leads to survivin upregulation, due in part to the activation of Notch1 and the release of a transcriptionally active Notch1 intracellular domain .	21731759:7, 21555376:6	2	2
LEP --+> vascularization	Regulation	However, the molecular mechanism for leptin-elicited angiogenesis remains to be elucidated., Leptin induced angiogenesis in cornea from Zucker lean rats, but not from Zucker fatty rats., Leptin has been shown to be involved not only in thermogenesis but angiogenesis as well., Leptin induces angiogenesis and is elevated in obesity and hyperinsulinemia., Recently, leptin was shown to possess an ang…	12711260:2, 12921973:9, 14724368:3, 12411472:1, 10868868:1, 12393625:11, 20137154:4, 18573568:1, 11494053:2, 11925116:1 <more data available...>	2	112
LEP --+> VEGFA	Expression	Incubation of 4T1 cells with anti-VEGF-R2 antibody increased leptin-mediated VEGF expression suggesting an autocrine/paracrine loop., Leptin upregulated the transcriptional expression of VEGF/VEGFR2 in MCF-7 and MDA-MB231 cells., The present study suggests that leptin could elicit angiogenesis through autocrine VEGF production via intracellular reactive oxygen species generation., Although it did…	16825198:3, 19531256:6, 12711260:9, 12779248:4, 15546570:5, 18821585:4, 15331557:7, 21475828:4, 11152449:1134, 17786229:1142 <more data available...>	2	23
LEP ---> blood vessel development	Regulation	Recent studies have provided evidence that leptin has significant effects on vascular development and repair., This is the first study demonstrating that leptin can induce preneoplastic colon epithelial cells to orchestrate VEGF-driven angiogenesis and vascular development, thus providing a specific mechanism and potential target for obesity-associated cancer., Perspective References Although the…	16940932:0, 19221001:10, 15181024:1211, 18292198:1072	2	4
LEP ---> ICAM1	Expression	Leptin could up-regulate cell surface expression of adhesion molecule ICAM-1 and CD18 but suppress ICAM-3 and L-selectin on eosinophils., Leptin blockade also affected expression of ICAM-1, OX-40, and very late antigen-4 on CD4+ T cells (Figure 8)., Lastly, as leptin promotes angiogenesis and induces the expression of bcl-2, intercellular adhesion molecule 1 and matrix metalloproteinases, it coul…	17634954:5, 16410832:1141, 16269446:1085, 21040518:1260	2	4
LEP ---> NOTCH1	Expression	Moreover, Notch expression is regulated by hypoxia and inflammatory cytokines (IL-1, IL-6 and leptin)., In addition, blockade of IL-1R tI inhibited leptin-induced Notch, Hey2 and survivin as well as VEGF/VEGFR-2 expression., Leptin treatment leads to survivin upregulation, due in part to the activation of Notch1 and the release of a transcriptionally active Notch1 intracellular domain .	21193018:2, 21731759:7, 21555376:6	2	3
LEP ---> vasculogenesis	Regulation	These findings are relevant to leptin-mediated regulation of vasculogenesis in humans, and the association between hyperleptinemia and obesity with cardiovascular disease., In response to hypoxia, adipose tissues produce hypoxia inducible factor 1a-induced angiogenic factors such as VEGF, leptin, TNF-a, and PAI-1, which regulate angiogenesis and vasculogenesis (49, 50).	15950978:11, 17786229:1102	2	2
MMP2 --+> vascularization	Regulation	Two members of the family, gelatinase A and B play an important role in angiogenesis., We also demonstrated that MMP-2 is a primary mediator of Amadori-PE-driven angiogenesis., This augmentation of angiogenesis was hindered by inhibition of pro-MMP-2 and mature MMP-2., Gelatinase A, a member of the matrix metalloproteinase family, plays an important role during angiogenesis., Expression of MMP-2 …	11470230:3, 14644453:5, 20486790:9, 10785359:0, 15946548:6, 15387709:8, 12566302:0, 10996658:0, 17344928:0, 20492444:2 <more data available...>	2	111
MMP2 ---> arteriogenesis	Regulation	Collectively, these findings suggest that matrix metalloproteinase-2-mediated impairment of arteriogenesis and angiogenesis may be at least partially reduction of VEGF production resulting from the decreased macrophage infiltration in the ischemic hindlimb of MMP-2-/- mice., Matrix metalloproteinases have been shown to mediate nitric oxide-induced cadherin/ß-catenin dissociation.29,30 In addition…	17322177:1210, 16847153:1174	2	2
MMP2 ---> blood vessel development	Regulation	P4 suppressed the expression of vascular endothelial growth factor (VEGF) and matrix metalloproteinases (MMP-9, MMP-2), which are involved in tumor vascular development.	21695351:7	2	1
MMP2 ---> Breast Neoplasms	Regulation	MMP-2 and its inducer CD147 maybe participate in invasion and metastasis of breast cancer., In conclusion, this meta-analysis suggested that MMP-2 -1306 C/T polymorphism may contribute to breast cancer susceptibility., MMP-2 may be a useful target for breast cancer therapy when refinement of MMP inhibitors provides for MMP-specific agents., Our results are highly suggestive that MMP2 plays a role…	16004819:10, 21161369:8, 14744781:8, 17505812:10, 16158251:8, 16546677:2, 8411260:15, 9740080:1363, 18373849:1214, 20649976:1248 <more data available...>	2	12
MMP2 ---> vasculogenesis	Regulation	Thus, MMP-2 is selectively required for Endothelial progenitor cell vasculogenesis., Taken together, our results support the notion that MMP-2 is necessary not only for angiogenesis but also for vasculogenesis., Cooperative interactions of laminin 5 gamma2 chain, matrix metalloproteinase-2, and membrane type-1-matrix metalloproteinase are required for mimicry of embryonic vasculogenesis by agress…	19874467:7, 17322177:1234, 16294195:1246, 11522618:100, 20375132:1476, 16847153:1174, 17395877:1072	2	7
MMP2 ---| endothelial cell proliferation	Regulation	Examples of the “molecular target hypothesis” include inhibition of endothelial cell proliferation by the homocysteine metabolite S-adenosylhomocysteine (35), modulation of neuronal N-methyl-d-aspartic acid-like receptor activity by homocysteine (36), the inhibition of tissue plasminogen activator binding to homocysteinylated annexin II (37), activation of matrix metalloproteinases such as latent…	11592966:1266	2	1
MMP9 --+> Breast Neoplasms	Regulation	These suggest that the genes of KiSS-1, NF-kappaBp50 and MMP-9 could be involved in the progression and metastasis of breast cancer., Together our results suggest that MMP-2, -3 and -9 may be involved in the process of metastasis of breast cancer to the brain., The peptide CTT (CTTHWGFTLC) was identified as a selective inhibitor of MMP-2/9 that inhibits the growth of MDA-MB-435 human breast cance…	18844032:7, 16158251:8, 16546677:2, 15617842:7, 11731079:6, 18451168:100, 14978035:1238, 18373849:1214, 16675452:1352, 15059880:1133 <more data available...>	2	21
MMP9 --+> ICAM1	Expression	The capacity of the MMP-9 inhibitor to prevent sICAM-1 production may be useful for the development of novel therapeutic approaches relevant to osteoarthritic., The soluble factors they release in its presence arrest the cycle of endothelial cells , inhibit in vitro angiogenesis, negatively modulate the production of matrix metalloproteinase-9, and the ability of endothelial cells to adhere to vi…	17161959:12, 11238633:3, 15289337:1246	2	3
MMP9 --+> vascularization	Regulation	MMP-9 may be a potential target to disrupt tumor neovascularization., Human gelatinase B is involved in tissue remodeling and angiogenesis., Matrix metalloproteinase-9 (MMP9) plays an important role during angiogenesis., MMP-9 expression correlated with B symptoms and decreased new vessel formation., It has been recently found that MMP-9 also plays a role in tumor angiogenesis., Matrix metallopro…	20873997:2, 9479001:0, 14624478:0, 12431239:2, 15025968:1, 12851530:0, 11781819:0, 12393846:6, 18559512:11, 19016770:3 <more data available...>	2	112
MMP9 ---> arteriogenesis	Regulation	Matrix metalloproteinases have been shown to mediate nitric oxide-induced cadherin/ß-catenin dissociation.29,30 In addition, at least 2 members of the Matrix metalloproteinases family, Matrix metalloproteinase-2 (72 kDa) and Matrix metalloproteinase-9 (92 kDa), play an essential role in vasculogenesis, angiogenesis, and arteriogenesis, 3 processes critical to restoration of tissue perfusion after…	16847153:1174	2	1
MMP9 ---> blood vessel development	Regulation	P4 suppressed the expression of vascular endothelial growth factor (VEGF) and matrix metalloproteinases (MMP-9, MMP-2), which are involved in tumor vascular development.	21695351:7	2	1
MMP9 ---> endothelial cell proliferation	Regulation	MMP-9 inhibitor GM6001 significantly decreases human cerebral endothelial cell proliferation and migration (p<0.05), indicating the crucial function of MMP-9 in promoting angiogenic changes in human cerebral endothelial cells., Thus treatment with MMP-9 decreases endothelial cell proliferation in vitro., Liotta et al obtained results where type IV gelatinase activity correlated with cancer metast…	16516857:6, 11803470:1111, 16609063:1129	2	3
MMP9 ---> ITG	Regulation	Mice in which the integrin-binding motif was mutated to an integrin-disrupting motif (Fbln5RGE/RGE) exhibited upregulation of MMP-9 in vaginal tissues., To evaluate the potential contribution of MMP-9 to E-cadherin cleavage, integrin aggregation was induced in the presence of a MMP-9 function blocking antibody., Among these IVIG-mediated mechanisms may be the suppression of TNF-a (also induced by…	21519142:4, 17332331:1236, 12404299:1239, 20519536:1320, 18174366:1213	2	5
MMP9 ---> ITGB1	Expression	Taken together, our results indicate that MMP-9 inhibition induces apoptosis due to altered beta1-integrin expression in medulloblastoma., Further, spinal administration of exogenous MMP-9 induces morphine withdrawal-like behavioral signs and mechanical allodynia, activates NR1 and NR2 receptors, and downregulates integrin-beta1, while a function-neutralizing antibody against integrin-beta1 suppr…	17991734:7, 20519536:6, 21855630:6	2	3
MMP9 ---> NOTCH1	Regulation	MMP-9 mediates Notch1 signaling via p53 to regulate apoptosis, cell cycle arrest, and inflammation.	21723221:10	2	1
MMP9 ---> vasculogenesis	Regulation	Matrix metalloproteinase-9 is required for tumor vasculogenesis but not for angiogenesis: role of bone marrow-derived myelomonocytic cells., Matrix metalloproteinase-9 is required for tumor vasculogenesis but not for angiogenesis: role of bone marrow- derived myelomonocytic cells., These data provided ex vivo evidence that deficiency of MMP-9 activity impairs microvessel formation and the vasculo…	18328424:100, 20592171:1576, 21258010:1502, 19790065:1573, 19461050:1123, 16847153:1174, 17395877:1072	2	7
Notch --+> Breast Neoplasms	Regulation	The Notch pathway is dysregulated in human breast tumors and overexpression of constitutively active Notch proteins induces mammary tumors in mice.	21666715:4	2	1
Notch ---> blood vessel development	Regulation	Functionally, Notch receptors and ligands are necessary for vascular development., A number of data indicate that appropriate temporal activation of Notch receptors is required for proper vascular development and angiogenesis., hypoxia-inducible factor and Notch family members are critical for proper vascular development, especially during endothelial remodeling, and both families are tightly reg…	15187023:1055, 15044497:1275, 17636018:1302, 15520367:1149	2	4
Notch ---> Breast Neoplasms	Regulation	Aberrant activation of Notch receptors has been shown to cause mammary tumors in mice., Members of the Notch family are involved in the development of breast cancer in animal models and in humans., However, it is currently not known which, if any, of the NOTCH receptors are involved in the development of ErbB2-negative breast cancers.	16166334:0, 20562911:0, 18339869:1067	2	3
Notch ---> endothelial cell proliferation	Regulation	Notch1 is also expressed on endothelial cells, and our data support the notion of a redundancy of function of Notch4 and Notch1 by demonstrating that both members of the Notch family regulate endothelial cell proliferation via a mechanism that converges on inhibition of retinoblastoma protein phosphorylation (15).	15456857:1302	2	1
Notch ---> vascularization	Regulation	Recent data indicate that Notch receptors also play a role in tumor angiogenesis., A number of data indicate that appropriate temporal activation of Notch receptors is required for proper vascular development and angiogenesis., Alternatively, arteries in Cerebral autosomal-dominant arteriopathy with subcortical infarcts and leukoencephalopathy patients may be developmentally altered, because Notc…	18559519:1078, 15044497:1275, 15017012:1146	2	3
Notch ---> vasculogenesis	Regulation	The Notch family of receptors and ligands plays an important role in cell fate determination, vasculogenesis, and organogenesis., Normal vasculogenesis is required for normal differentiation of type I from type II pneumocytes, and the Notch family is important in embryonic vasculogenesis.	12456485:0, 12673204:1119	2	2
NOTCH1 --+> arteriogenesis	Regulation	Notch signaling activity regulates arteriogenesis., Notch signaling plays an important role in the arteriogenesis., Thus, Dll1-mediated Notch activation regulates ephrin-B2 expression and postnatal arteriogenesis., Notch controls arteriogenesis in the adult., Therefore, TACE increases Notch1 expression and activity, which may regulate arteriogenesis., Thus Notch1/Dll4 may have a particularly impo…	18927449:0, 20026381:0, 17234965:7, 17938237:1146, 19223914:1211, 16778118:1192, 21301413:100, 18591437:1195	2	8
NOTCH1 --+> Breast Neoplasms	Regulation	The Numb-mediated regulation of Notch is believed to play a causative role in naturally occurring breast cancers., Combined inhibition of Notch and estrogen signaling has synergistic effects in ERalpha-positive breast cancer models., Recently, a Notch/Myc relationship in oncogenesis was revealed from a mouse model, in which mammary tumors are induced by the intracellular domain of Notch1 (N1(IC))…	17332928:4, 19838210:3, 17329972:1, 10980592:2, 19219656:0, 16947085:2, 15288259:4, 18836481:6, 16751266:1, 18593923:1070 <more data available...>	2	35
NOTCH1 --+> MMP2	Expression	Hypoxia-induced Notch1 activation increased the expression of matrix metalloproteinase-2 (MMP2) and MMP9, which increased invasiveness.	23289374:10	2	1
NOTCH1 --+> MMP9	Expression	Enforced expression of the cleaved Notch1 in macrophages induces the expression of COX-2 and MMP-9., Down-regulation of Notch-1 also decreased not only MMP-9 mRNA and its protein expression but also inactivated the pro-MMP-9 protein to its active form., We demonstrate that Notch mediates VEGF-induced matrix metalloprotease activity via induction of MMP9 and MT1-matrix metalloprotease expression a…	19290049:5, 16510599:5, 21349159:6, 19147749:10, 19771395:7, 20147635:1271, 19710690:1416, 23289374:10	2	8
NOTCH1 --+> VEGFA	Expression	Consistent with these results, we found that the down-regulation of Notch-1 reduced nuclear factor-kappaB DNA-binding activity and VEGF expression., Abnormally low expression of Notch1 in esophageal squamous cell carcinoma may be one of the upstream factors to induce high expression of VEGF and increased microvessel density., Notch processing by gamma-secretase results in cleavage of the notch in…	16510599:4, 19923082:7, 18302767:3, 19339510:1198, 19508709:1304, 20522599:1136, 20668292:1055, 18299578:1180, 21731759:100, 23067214:7	2	10
NOTCH1 ---> blood vessel development	Regulation	Notch signaling plays a key role in embryonic vascular development and angiogenesis., Notch signaling plays an essential role in vascular development and human vascular diseases., To examine the molecular mechanisms by which Notch regulates vascular development, we analyzed changes in gene expression in response to Notch signaling., Notch and transforming growth factor-beta (TGFbeta) play pivotal…	20737536:0, 19673359:0, 12814948:2, 20368328:0, 11741889:11, 16697642:2, 17948123:7, 18256896:2, 17556669:1075, 12242716:1193 <more data available...>	2	26
NOTCH1 ---> MMP2	Regulation	We demonstrate that Notch mediates VEGF-induced matrix metalloprotease activity via induction of MMP9 and MT1-matrix metalloprotease expression and activation of MMP2., This might be the result of activation of oncogenes or loss of tumor suppressors; for example, MMP-2, MMP-7, or MMP-9 is upregulated through combined activation of the transcription factors PEA3, Ets-1, c-Jun, ß-catenin, LEF-1, ME…	21349159:6, 19934312:1064, 19473992:1130, 19473993:1130, 22490851:9	2	5
NOTCH1 ---> vascularization	Regulation	Notch is a critical regulator of angiogenesis and arterial specification., Notch signaling plays a key role in embryonic vascular development and angiogenesis., The transcription factors hypoxia-inducible factor-1alpha and Notch are key regulators of angiogenesis., Inhibition of Notch signalling attenuated visfatin-induced angiogenesis in vitro, ex vivo, and in vivo., Dll4/Notch interaction is es…	20298529:0, 20737536:0, 17885420:1, 20817637:1, 20508179:12, 19433762:0, 20624122:3, 18289013:2, 21443520:6, 21533193:3 <more data available...>	2	56
NOTCH1 ---> vasculogenesis	Regulation	Regulation of vascular morphogenesis by Notch signaling., Notch intracellular domain1 or Notch intracellular domain4 overexpression in cultured endothelial cells either inhibits (39, 45) or promotes (41, 64, 69) vascular morphogenesis., The Notch gene family encodes large transmembrane receptors and may regulate embry- onic cell migration, vascular morphogenesis and remodelling.3 Evidence from ne…	17938237:100, 21301413:1288, 19546852:1262, 17220278:1055, 11803454:1053	2	5
NOTCH1 ---> VEGFC	Regulation	Notch via its induction of VEGFR-3 mediates VEGF-C induced endothelial cell survival and morphological changes.	17948123:1277	2	1
NOTCH1 ---| endothelial cell proliferation	Regulation	Moreover, Notch1 mediates VEGF-induced endothelial cell proliferation and migration (35)., We found that Notch1 contributes to VEGF-induced endothelial cell proliferation, migration, and survival., Dll4/Notch signaling in turn attenuates VEGF signaling, thus arresting endothelial cell proliferation, followed by recruitment of mural cells and vessel maturation [7-9,11,12]., The activation of Notch…	17720887:1254, 17158336:1202, 21092311:1065, 16951162:1343, 17556669:1256, 17090652:1262, 16141350:1212	2	7
NOTCH1 ---| vascularization	Regulation	Notch is a critical regulator of angiogenesis, vascular differentiation, and vascular integrity., Notch promotes cell survival, angiogenesis and treatment resistance in numerous cancers, making it a promising target for cancer therapy., We have tested both an agonist and antagonist of Notch signaling to study the effects of Notch-mediated angiogenesis on spinal cord vascular pathology following t…	21795743:0, 22399357:1, 21156172:1, 22399348:6, 22010178:14, 22858860:0, 22275240:11, 21822553:0, 22848434:0, 22866202:7 <more data available...>	2	13
NOTCH2 ---> blood vessel development	Regulation	Together, these findings infer that Notch2 and Notch3 act together to govern vascular development and smooth muscle differentiation.	22615991:3	2	1
NOTCH2 ---> Breast Neoplasms	Regulation	Therefore, Notch-1 may possess tumour-promoting functions, while Notch-2 could play a tumour-suppressive role in human breast cancer., NOTCH1 may thus have tumor-promoting functions, whereas NOTCH2 could have a tumor-suppressive role in human breast cancer, supporting the suppression of NOTCH-1 activity as a therapeutic strategy., Our Quantitative real time-polymerase chain reaction analysis obta…	15492845:8, 17409286:1626, 20569497:1216	2	3
NOTCH2 ---> vasculogenesis	Regulation	Approximately 25% of these glomeruli have distinct aneurisms instead of capillary tufts.35 Notch2 hypomorphic mice also display generalized edema, although it is not clear whether this is a consequence of a role for Notch2 in lymphatics or a result of its effects in the heart.35 Together these findings indicate that Notch2 is critical for the vascular morphogenesis of a more selective group of va…	17556669:1116	2	1
NOTCH2 ---| MMP9	Regulation	Down-regulation of Notch2 by small interfering RNA enhanced tumor cell invasion (100.00% ± 21.64% vs 162.22% ± 16.84%, P < 0.05) and expression of MMP9 (1.56 fold, P < 0.05), and activated the pro-MMP9 protein to its active form (1.48 fold, P < 0.05).	23326131:8	2	1
NOTCH3 --+> Breast Neoplasms	Regulation	Overexpression of activated Notch-1 and Notch-3 has been shown to induce mammary tumor formation in mice (52)., We believe that NOTCH3 may have all of the properties of lineage-specific oncogenes in breast cancer., Overexpression of activated murine Notch1 and Notch3 in transgenic mice blocks mammary gland development and induces mammary tumors., A recent study further shows that overexpression o…	17638894:1386, 18339869:1270, 16507912:100, 17332312:1085, 18060036:1227, 22396495:0	2	6
NOTCH3 --+> vascularization	Regulation	These results provide compelling evidence that Notch3 is important for the investment of mural cells and is a critical regulator of developmental and pathological blood vessel formation., These results convincingly demonstrate that NOTCH3 has a role in fibroblast-mediated angiogenesis. *.	20689064:9, 19150886:1195	2	2
NOTCH3 ---> blood vessel development	Regulation	Notch3 plays a role in vascular development and its expression is largely confined to vascular smooth muscle cells in adulthood (22)., These observations signify that Notch3 might have a unique role in modulating vascular development under pathological conditions. [Figure 8] View larger version (37K): [in this window] [in a new window] ., CADASIL is a result of a variety of mutations in the NOTCH…	15867348:1236, 20689064:1218, 12574530:1067, 22615991:3	2	4
NOTCH4 --+> Breast Neoplasms	Regulation	Constitutive activation of Notch-1 (12, 13) or Notch-4 (11) causes mammary carcinogenesis in mice., In this model, induction of mammary tumors by activated Notch4 would be at the low end of the signaling gradient., This particular alteration has been proposed to be important for Notch4's ability to induce mammary tumors in mice., A mouse transgenic model of activated Notch4-driven breast cancer i…	18593923:1070, 15531924:1156, 14762442:1152, 17984306:1261, 17409286:1579, 20068161:1269, 18671830:1243	2	7
NOTCH4 --+> endothelial cell activation	Regulation	Impaired Notch4 activity elicits endothelial cell activation and apoptosis: implication for transplant arteriosclerosis.	18802018:100	2	1
NOTCH4 --+> MMP2	Expression	Nelfinavir affects Notch 4 processing that results in induction of expression of the pro-angiogenic genes NFkappaB and matrix metalloproteinase 2 in cerebral endothelial cells.	18302767:10	2	1
NOTCH4 ---> vasculogenesis	Regulation	Additional receptors, including Notch-4 (40) and ephrins (41) are important regulators of vasculogenesis and angiogenesis.	11827993:1318	2	1
NOTCH4 ---| blood vessel development	Regulation	In contrast, increased expression of Notch4 impairs vascular development, as is evident in mice harboring a transgene for an activated form of Notch4 (8)., This phenotype is more severe than that of Notch1 mutants alone, suggesting that Notch1 and Notch4 have partially redundant roles during embryonic vascular development., Although the last two studies demonstrate that both increases and decreas…	14672936:1217, 17409286:1338, 11909975:1381, 19812212:1060, 17185616:1063	2	5
NOTCH4 ---| vascularization	Regulation	Based on the function of other Notch family members and the expression pattern of Notch4, we postulated that Notch4 activation would modulate angiogenesis., Among them Notch1/4, Hey1/2, Dll4 and RBPJkappa have been shown to be crucial for fetal angiogenesis, Notch2 is necessary for formation of maternal blood vessels in the placenta and Mash2 is indispensable for proper trophoblast cell type spec…	11909975:3, 18603295:4, 17279577:1818, 11827993:1318, 15044497:1279, 15456857:1146, 14528285:1134, 12482957:1131, 19218547:1054, 17054791:1375 <more data available...>	2	12
VEGFA --+> arteriogenesis	Regulation	In vitro experiments suggest that nerve-derived VEGF may be important for arteriogenesis, but its role in vivo remains unclear., However, when co-delivered with VEGF, TERTdn abrogated VEGF-dependent angiogenesis, arteriogenesis, and blood flow increase., The negative effects of smoking on monocyte function may translate into adverse impacts on VEGF-A-dependent repair processes such as arteriogene…	15673567:1, 15687494:5, 17053168:10, 14985076:9, 17885189:11, 16188064:14, 15916974:1, 18802023:3, 12810080:0, 12714562:6 <more data available...>	2	54
VEGFA --+> blood vessel development	Regulation	Vascular endothelial growth factor (VEGF) is known to play an essential role in vascular development., Vascular permeability factor (VPF) is an important mediator of vascular development in tumors., Vascular endothelial growth factor (VEGF) is an important mediator of vascular development in tumors., Vascular endothelial growth factor (VEGF)-A regulates vascular development and angiogenesis., Vas…	16630570:0, 8644861:0, 9646228:0, 18664627:0, 10888256:0, 20224550:0, 11169844:6, 15557114:0, 12617854:3, 14516677:3 <more data available...>	2	107
VEGFA --+> Breast Neoplasms	Regulation	Due to it the VEGF seems to be an optimal therapeutic target in breast cancer therapy., VEGF might be a potential therapeutic target for human breast cancer., Her-2 and VEGF may play synergic roles in the occurrence and development of breast cancer., Vascular endothelial growth factor (VEGF) is recognized to play a predominant role in breast cancer prognosis., The angiogenic factor vascular endot…	19227609:2, 19162240:7, 20868598:6, 10604730:0, 12115372:0, 21119072:7, 20707740:12, 18079435:0, 14613032:0, 11866906:9 <more data available...>	2	73
VEGFA --+> endothelial cell activation	Regulation	Prior murine and human studies suggest that vascular endothelial growth factor (VEGF) contributes to endothelial cell activation and severity of illness in sepsis., Formation of a Rap1/Bmx complex was not observed in cells transfected with an expression vector for a dominant-negative Rap1, indicating that Bmx is a downstream Rap1 effector in VEGF-induced endothelial cell activation., Thrombin, va…	18598002:0, 15207703:5, 19208784:5, 7566855:0, 9612282:4, 10886518:1039, 19578010:1171, 14654523:1348, 15507525:1167, 17463183:1304 <more data available...>	2	21
VEGFA --+> endothelial cell proliferation	Regulation	VEGF has been shown to regulate endothelial cell proliferation and migration., Blocking led, as expected, to abrogation of VEGF-induced endothelial cell proliferation in vitro., Vascular endothelial growth factor (VEGF) is a potent stimulator of endothelial cell proliferation., Expressed VEGF165 can stimulate the vascular endothelial cell proliferation., Expressed VEGF165 can accelerate the vascu…	18509061:0, 12067896:5, 11158026:0, 15555444:10, 16109517:13, 10487612:0, 20715116:1, 11432658:2, 11895203:0, 18565703:5 <more data available...>	2	125
VEGFA --+> endothelialization	Regulation	VEGF plays the key role in reendothelialization., Moreover, 8 weeks of VPF administration resulted in 88.1 +/- 3.1% re-endothelialization compared to control (44.7 +/- 3.8%)., Moreover, regulation of VEGF by alpha2-AP significantly affected reendothelialization after vascular injury., Vascular endothelial growth factor (VEGF) is highly expressed in vascular remodeling processes and accelerates re…	11832184:8, 7946409:5, 16515500:7, 10828020:0, 15477421:10, 12538420:9, 11758260:9, 9240325:11, 12123557:8, 12893771:6 <more data available...>	2	53
VEGFA --+> ICAM1	Expression	VEGF increases retinal vascular ICAM-1 expression., VEGF (20 ng/ml) increased expression of ICAM-1, VCAM-1, and E-selectin mRNAs in a time-dependent manner., In this study, we provided a new mechanism to explain that VEGF does up-regulate the expression of ICAM-1 in retinal ECs., Adrenomedullin inhibited the VEGF-induced protein and mRNA expression of ICAM-1, VCAM-1, and E-selectin., RT-PCR and p…	10393052:8, 11108718:2, 19236815:3, 12805078:4, 15637298:7, 14744874:9, 15579431:5, 10374752:6, 15020646:5, 11839570:12 <more data available...>	2	60
VEGFA --+> ITG	Expression	IL-1beta, expressed by the blastocyst, induces vascular endothelial growth factor (VEGF) which, in turn, promotes angiogenesis and integrin expression in endometrial cells., The authors investigated the regulation of expression of these angiogenic integrins by hypoxia and vascular endothelial growth factor (VEGF) in retinal microvascular endothelial cells in culture., Studies in cultured lymphati…	11023800:2, 9579483:1, 15132990:4, 9775530:4, 10924500:1199, 19351819:1157, 17085437:1070, 16980351:1432, 11139149:100, 14996996:1230 <more data available...>	2	18
VEGFA --+> ITGB1	Expression	Thus, VEGF can modulate angiogenesis via increased expression and activation of alpha(6)beta(1) integrins, which may promote VEGF-driven tumor angiogenesis in vivo., Treatment with anti-VEGF antibody decreases the expression of integrin alphav, integrin beta1, DNA-PK(CS) and ATM with a corresponding increase in ionizing radiation -induced apoptosis., CD29 (ß1-integrin) expression was significantl…	17085437:7, 15135073:2, 14968118:1161, 18840653:1249, 16774905:1234, 9391074:1182, 18566344:1309	2	7
VEGFA --+> MMP2	Expression	The expression of MMP-2 was increased as early as 1 hour post VEGF treatment., VEGF-induced MMP-2 mRNA expression was reduced by inhibition of JNK or by treatment with c-Jun siRNA., VEGF can upregulate the expression of MMP-2, MMP-9 in HL-60 and a part of the primary leukemic cells., MMP-2 mRNA and protein were significantly increased during VEGF165 cDNA transfection; MMP-2 activity was also incr…	20635039:13, 16672691:8, 16584583:10, 16525667:6, 9473407:3, 19306293:4, 16369727:10, 19763043:4, 12133405:4, 19068239:6 <more data available...>	2	33
VEGFA --+> MMP9	Expression	The hypoxic expression of MMP-9 was mediated by autocrine VEGF signaling., MMP-9, but not MMP-2, mRNA was increased during VEGF stimulation., VEGF can upregulate the expression of MMP-2, MMP-9 in HL-60 and a part of the primary leukemic cells., It is possible that upregulation of HIF-1/VEGF is involved in the enhancement of MMP-9 expression under hypoxic conditions., Vascular endothelial growth f…	17724228:9, 15256478:5, 16584583:10, 20631454:8, 12851530:1, 16645174:7, 10953026:5, 9776730:5, 18403633:9, 21349159:6 <more data available...>	2	40
VEGFA --+> Notch	Expression	VEGF is upregulated in response to hypoxia11 and promotes angiogenesis in ischemic tissues.12 Although VEGF also increases the expression of Notch receptors and their ligands, it is not known whether Notch receptors are necessary for VEGF-mediated angiogenic response.13 The purpose of this study was to determine whether Notch1 and/or Notch4 are essential for postnatal angiogenesis and, if so, to …	17158336:1060	2	1
VEGFA --+> NOTCH1	Expression	For arterial specification, vascular endothelial growth factor (VEGF) induces expression of Notch signaling genes, including Notch1 and its ligand, Delta-like 4 (Dll4), and Foxc1 and Foxc2 transcription factors directly regulate Dll4 expression., This down-regulation of VEGF in preeclamptic placentas, in turn, probably decreases Notch protein expression in placental compartments and in endothelia…	20238301:1, 17955263:10, 17158336:4, 18827808:1150, 20436223:100, 12482957:1174, 19097050:1223, 12865906:1124, 18093989:1225, 17376817:1254 <more data available...>	2	17
VEGFA --+> NOTCH4	Expression	Overexpression of VEGF-induced Notch4 and the Notch ligand, Dll4, activated Notch signaling, and altered endothelial cell morphology in a fashion similar to that induced by Notch activation., In venous endothelial cells, we showed that VEGF up-regulates DLL4 and presenilin, and increased the activation of Notch4, leading to an up-regulation of ephrin B2 with a down-regulation of Eph B4., This und…	21349159:4, 16951162:5, 18093989:1225, 17220278:1062, 17185616:1216	2	5
VEGFA --+> vascularization	Regulation	VEGF165 induces marked vascular growth., VEGF is a major inducer of angiogenesis., VEGF is an important factor for angiogenesis., VEGF-A promotes angiogenesis in many tissues., VEGF and HIF-1 are potent inducers of angiogenesis., VEGF plays a central role in tumor angiogenesis., CRHR-2 inhibits VEGF-induced neovascularization., VEGF plays a principal role in tumor angiogenesis., VEGF was an impor…	1384392:3, 19800880:0, 14717227:0, 16453023:0, 18288940:6, 17615535:3, 18484196:2, 15064856:2, 12500403:10, 18282597:1 <more data available...>	2	547
VEGFA --+> vasculogenesis	Regulation	Vascular endothelial growth factor (VEGF) is a regulator of vasculogenesis and angiogenesis., Vascular endothelial growth factor (VEGF) plays an important role in early embryonic vasculogenesis., Recent evidence indicates that VEGF is essential for embryonic vasculogenesis and angiogenesis., Vascular endothelial growth factor (VEGF) is a major inducer of angiogenesis and vasculogenesis., Vascular…	9399960:0, 10340756:0, 10494799:1, 14987558:0, 10815805:0, 11494124:0, 14986821:0, 12058259:0, 15814647:1, 11245271:0 <more data available...>	2	108
VEGFB --+> arteriogenesis	Regulation	The VEGF-B transgene induces strong arteriogenesis in rat myocardium., VEGFR-1 mediated biological functions remain undetermined although early reports suggest that VEGF-B [57] and PlGF [58] may induce angiogenesis, arteriogenesis and vasculogenesis., While one study reported smaller heart and abnormal coronary artery vasculature caused by VEGF-B deficiency in mice (17), this was not observed in …	20937974:1134, 15664390:1146, 18259607:1061, 19188502:100, 16109918:1277	2	5
VEGFB --+> endothelial cell proliferation	Regulation	Vascular endothelial growth factor-B is therefore unlikely to promote endothelial cell proliferation or migration directly.	12942123:1191	2	1
VEGFB --+> vascularization	Regulation	VEGF-B, but not FGF-2, caused angiogenesis in the tibialis anterior muscle., Its correlation with VEGF, b-FGF, and mean vessel density potentiates its possible role in angiogenesis., Vascular endothelial growth factors A and B (VEGF-A and VEGF-B) play a major role in angiogenesis and activate VEGF receptor 1 (VEGFR-1)., VEGF-A and VEGF-B play major roles in angiogenesis as ligands of tyrosine act…	18552506:11, 10443829:10, 17150246:0, 16967703:5, 18479712:1, 9426398:7, 12805240:11, 14713119:9, 18511699:2, 19684473:1 <more data available...>	2	52
VEGFB --+> vasculogenesis	Regulation	VEGFR-1 mediated biological functions remain undetermined although early reports suggest that VEGF-B [57] and PlGF [58] may induce angiogenesis, arteriogenesis and vasculogenesis., This raises the question of whether VEGF-B is truly angiogenic, as suggested in previous in vivo studies, or whether VEGF-B may have promoted vessel growth by vasculogenesis through mobilization/recruitment of EPCs.	15664390:1146, 16109918:1269	2	2
VEGFB ---> ICAM1	Regulation	B, time-response curve of ICAM-1 regulation by basic fibroblast growth factor, VEGF-A, VEGF-B, and VEGF-C, as measured by flow cytometry. -[?]´-, basic fibroblast growth factor; -[?]¾-, VEFG-A; -?-, VEGF-C; -•-, VEFG-D.	15534089:1198	2	1
VEGFC --+> Breast Neoplasms	Regulation	VEGF-C, COX-2, and lymph vessel density play important roles in the lymphatic metastasis of breast cancer., In conclusion, these results indicate that lentivirus-mediated VEGF-C small interfering RNAs offers a new approach for therapeutic intervention to prevent tumor growth and lymphatic metastasis of breast cancer., Activation of VEGF-C/VEGF-D/VEGFR-3 axis increases motility and invasiveness of…	18353210:4, 19382240:12, 20164015:6, 12692195:1126, 16204074:1195, 18923001:1194, 20179201:1055, 20179202:1055, 17912247:1188, 12782611:1104 <more data available...>	2	13
VEGFC --+> endothelial cell proliferation	Regulation	VEGF-C secreted by PANC-1 cells stimulated human lymphatic endothelial cell proliferation., soft-tissue sarcoma cells secreted functional VEGF-C: soft-tissue sarcoma conditioned medium induced lymphatic endothelial cell proliferation and migration, which was abrogated by soft-tissue sarcoma cell VEGF-C knockdown., These results suggest that whereas excess VEGF-C may enhance early lymphatic endoth…	19719950:6, 19351758:7, 15890974:7, 12388793:100, 11282897:1152, 11297234:1089, 20689828:1491, 18614759:1172, 9826710:1185, 17210781:1198 <more data available...>	2	19
VEGFC --+> endothelialization	Regulation	VEGF-C application reduced neointima formation and accelerated reendothelialization., Indeed, reports in animal models demonstrate that local administration of VEGF-A or VEGF-C leads to accelerated reendothelialization and a reduction in intimal thickening.2-5 ., VEGF-C has been shown to be angiogenic in the rabbit ischemic hindlimb model,104 and our recent unpublished data show that VEGF-C gene …	14769706:6, 15492329:1049, 10845866:1101	2	3
VEGFC --+> ITG	Regulation	Binding of VEGF-C and -D to a9ß1 activates the integrin.	15590642:1195	2	1
VEGFC --+> ITGB1	Expression	Integrin beta1 mRNA was greatly increased at 3 hours by stimulation of 100 ng/ml CXCL12 (before and after stimulation 0.53 +/- 0.10, 1.53 +/- 0.16; P < 0.01), and VEGF-C mRNA showed significant increase at 24 hours by treatment with CXCL12 (before and after stimulation 0.52 +/- 0.09, 1.11 +/- 0.15; P < 0.05).	17697603:9	2	1
VEGFC --+> MMP2	Expression	In contrast, the invasive and gelatinolytic activities of OMC-3 cells with lower gene expression levels of VEGF-C and MMP-2 were stimulated by the presence of 1 to 10 µg/mL VEGF-C in a concentration-dependent manner (Fig. 2C and F), respectively.	15867217:1184	2	1
VEGFC --+> vascularization	Regulation	VEGF-C may play an important role in the angiogenesis and lymphangiogenesis., Knockdown of VEGF-C also resulted in aberrant blood vessel formation in tadpoles., Vascular endothelial growth factor-C (VEGF-C) and VEGF-A are involved in lymphangiogenesis and angiogenesis., The recombinant VEGF-C induced angiogenesis in the chicken chorioallantoic membrane model., In addition to VEGF, c-met seems to …	16859137:12, 16116431:6, 18654613:1, 16159421:7, 15274358:11, 12452004:7, 18061373:11, 9708799:2, 14710191:5, 9826710:2 <more data available...>	2	107
VEGFC --+> vasculogenesis	Regulation	Vascular endothelial growth factor-C promotes vasculogenesis, angiogenesis, and collagen constriction in three-dimensional collagen gels.	15874936:100	2	1
VEGFC ---> blood vessel development	Regulation	The vascular endothelial growth factors VEGFA and VEGFC are crucial regulators of vascular development., Vegfc is required for vascular development and endoderm morphogenesis in zebrafish., VEGF-C is essential for embryonic lymphatic vascular development whereas VEGF-D has a dispensable modifier role in this process., It is possible that CLP24 participates also in VEGF-C-mediated blood vascular d…	20224550:0, 14710191:100, 18725566:1036, 20439428:1156, 10488101:1061, 19423848:1174	2	6
VEGFC ---> ICAM1	Regulation	VEGF-C and VEGF-D synergize with basic fibroblast growth factor to down-regulate ICAM-1 on endothelial cells.	15534089:1194	2	1
VEGFC ---> vasculogenesis	Regulation	We also demonstrate that Vegfc is required for vasculogenesis as well as angiogenesis in the zebrafish embryo., Vascular endothelial growth factor-C promotes vasculogenesis, angiogenesis, and collagen constriction in three-dimensional collagen gels., Several genes encoding growth factors/secreted molecules, such as apoEb, vegf-c, and granulin-A, were strongly expressed at 3 d postamputation (Figu…	14710191:5, 15874936:100, 16869712:1162, 22792354:6	2	4
VEGFC ---| NOTCH1	Regulation	Vegfa-Vegfr2 Signal and Vegfc-Vegfr3 Signal Are Required for Abnormal Branching of intersegmental vessels Vegfa-Vegfr2 (Kdr) and Vegfc-Vegfr3 (Flt4) signaling pathways are essential for vascular development in zebrafish and mammals.9,31 In the vascular sprouting, tip cells responding to Vegfa express Dll4, thereby suppressing Vegfr2 and Vegfr3 through Notch signaling in the stalk cells.3 In sarsk…	19423848:1174	2	1
VEGFR ligand --+> arteriogenesis	Regulation	Several growth factors, including VEGFs, fibroblast growth factors, PDGFs, MCP-1 and GM-CSF, have been shown to induce both angiogenesis and arteriogenesis [7].	15664392:1088	2	1
VEGFR ligand --+> ITG	Regulation	VEGFs and bFGF are well-established activators of endothelial integrin function both in vivo and in vitro.48-52 It has recently been demonstrated that SEMA3F inhibits the mitogenic effects of VEGF-A165 and bFGF on HUVECs.36 Inhibition of bFGF-induced proliferation did not seem to rely on the inhibition of the binding of bFGF to its receptors or on the up-regulation of VEGF or VEGFR-2 expression, …	16621967:1304	2	1
VEGFR ligand --+> vascularization	Regulation	The VEGFs and FGF-2 stimulate angiogenesis., Vascular endothelial growth factors are crucial regulators of angiogenesis and vasculogenesis., Vascular endothelial growth factors are key regulators of endothelial cell function and angiogenesis., Vascular endothelial growth factors and their receptors play key roles in angiogenesis and lymphangiogenesis., Vascular endothelial growth factors and thei…	15582590:0, 20603618:0, 21507243:0, 16505489:0, 15760960:2, 15366007:0, 11457758:0, 7515293:4, 19509553:0, 17658244:0 <more data available...>	2	67
VEGFR ligand ---> blood vessel development	Regulation	Vascular endothelial growth factors (VEGF) are potent effectors of vascular development., Vascular endothelial growth factors regulate vascular development, angiogenesis and lymphangiogenesis by binding to a number of receptors., There is now a consensus that the VEGFs are crucial for vascular development and neovascularization in physiological and pathological processes in both embryo and adult.…	12112468:1, 17658244:0, 13678960:1, 19179669:1156, 17329436:1061, 21711246:0, 22287362:0	2	7
VEGFR ligand ---> endothelial cell proliferation	Regulation	VEGFs are secreted or cell-bound proteins expressed by tumor cells that function in a paracrine fashion by binding to specific high-affinity transmembrane receptors on endothelial cells (8, 9) to promote endothelial cell proliferation and survival., vascular endothelial growth factors are secreted or cell surface-bound proteins expressed by tumor cells that bind to specific high-affinity transmem…	16299247:1075, 16912155:1066, 16195704:1031, 18836096:1059	2	4
VEGFR ligand ---> vasculogenesis	Regulation	Vascular endothelial growth factors are crucial regulators of angiogenesis and vasculogenesis., Vascular endothelial growth factors (VEGF) are the major inducers of vasculogenesis and angiogenesis in vertebrates., Vascular endothelial growth factors and their receptors are essential regulators of vasculogenesis and angiogenesis in both embryos and adults., Vascular endothelial growth factors and …	20603618:0, 15366007:0, 11457758:0, 19230644:0, 11160848:1, 20565841:1105, 11901186:1053, 18523681:1221, 21937420:1, 22670172:0	2	10
